# Supplementary material
Source: Royal Society of Chemistry journal article supplement (doi:10.1039/d5bm01447f)
Supplement: d5bm01447f1.pdf [file d5bm01447f1.pdf]

## Supplementary Information For

### Microparticle Uptake Reduces Efferocytic Capacity of Macrophages

Shivangi Mishra<sup>1</sup>, Bharti Aggarwal<sup>2#</sup>, Prem Singh Anant<sup>1#</sup>, Avinash Bajaj<sup>2</sup>, Siddharth  
Jhunjhunwala<sup>1\*</sup>

1 – Department of Bioengineering, G08 TSH Building, Indian Institute of Science, Bengaluru,  
India – 560012

2 – Laboratory of Tumour Immune Microenvironment, Regional Centre for Biotechnology,  
3rd Milestone, Faridabad-Gurgaon Expressway, Faridabad, India – 121001.

# - these authors contributed equally

\* Indicates corresponding author

Contact Information: [siddharth@iisc.ac.in](mailto:siddharth@iisc.ac.in)

Supplementary Figures S1 – S6:

Pages 2 – 9

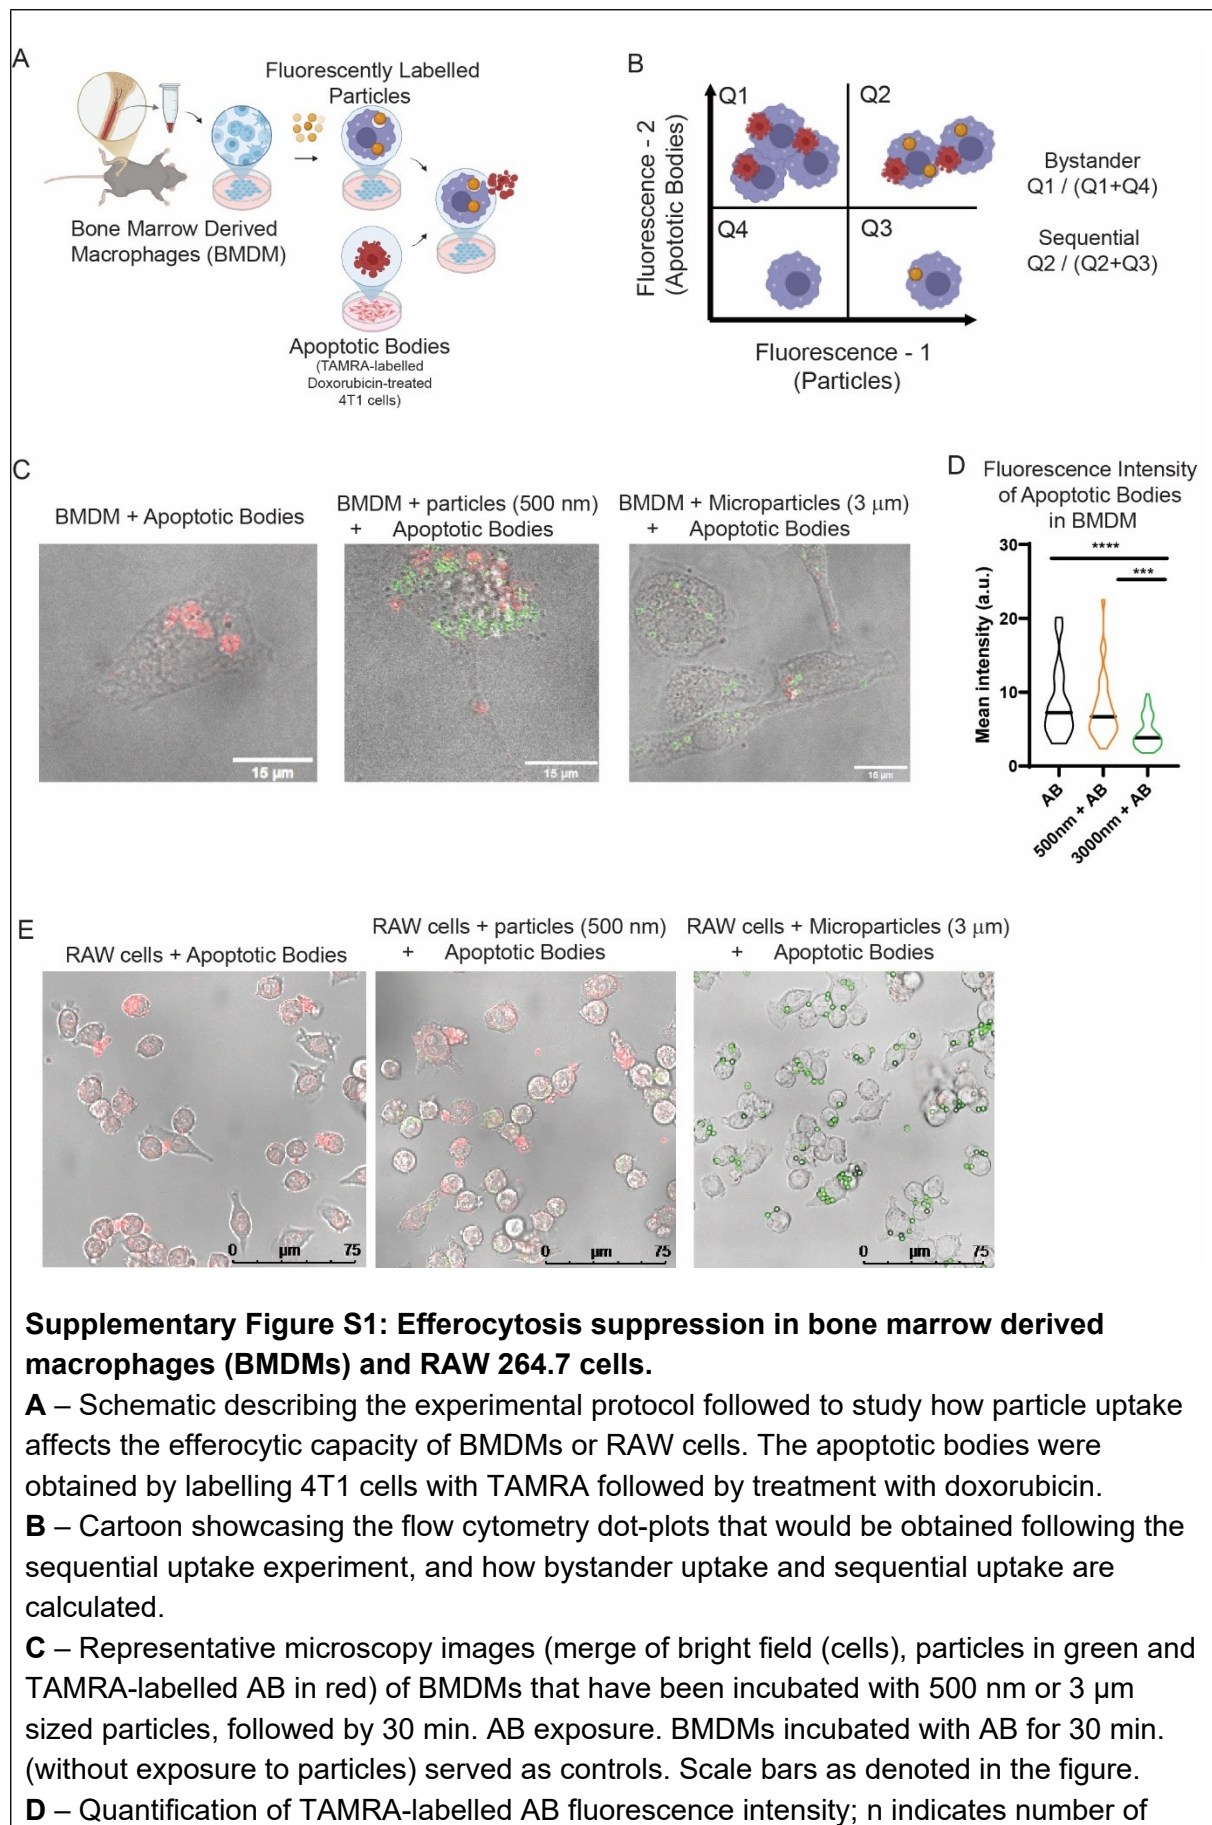

cells that were imaged. Data sets are representative of  $N \geq 3$  (independent experiments).  
\*\*\* $p < 0.001$ , \*\*\*\* $p < 0.0001$  (one-way ANOVA followed by post-hoc Tukey test).

**E** – Representative microscopy images (merge of bright field (cells), particles in green and TAMRA-labelled AB in red) of RAW cells similar to the data described in C.

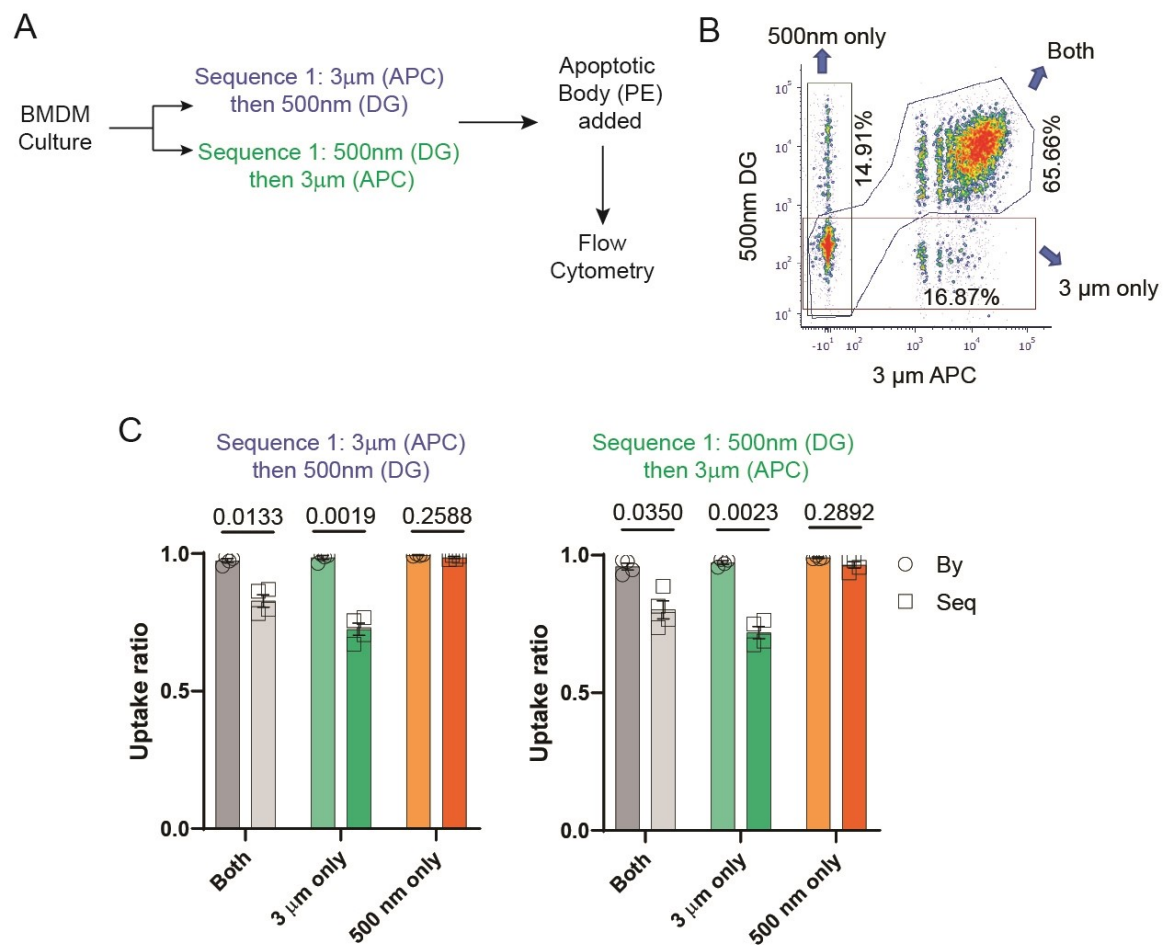

**Supplementary Figure S2:**

**A** – Schematic showing an experiment involving exposure of cells to particles of 2 sizes followed by apoptotic bodies (AB). The fluorophore used for each particle type and AB is indicated in parentheses. BMDM subpopulations pre-incubated with both particles for 1 hour each irrespective of the sequence followed by AB exposure (cell-to-AB ratio of 1:3 for 2 hours).

**B** – Representative flow cytometry plot showing gating strategy for particle positive and particle negative BMDMs. AB uptake was measured across particle-positive subpopulations including cells containing both particle sizes (500 nm and 3 µm), only 500 nm particles, or only 3 µm particles (sequential uptake) and compared to cells that did not take up particles (bystander uptake).

**C** – Quantification of the plots from B. p values are mentioned, which was calculated using a two-way ANOVA followed by Sidak test; N = 4 independent experiments.

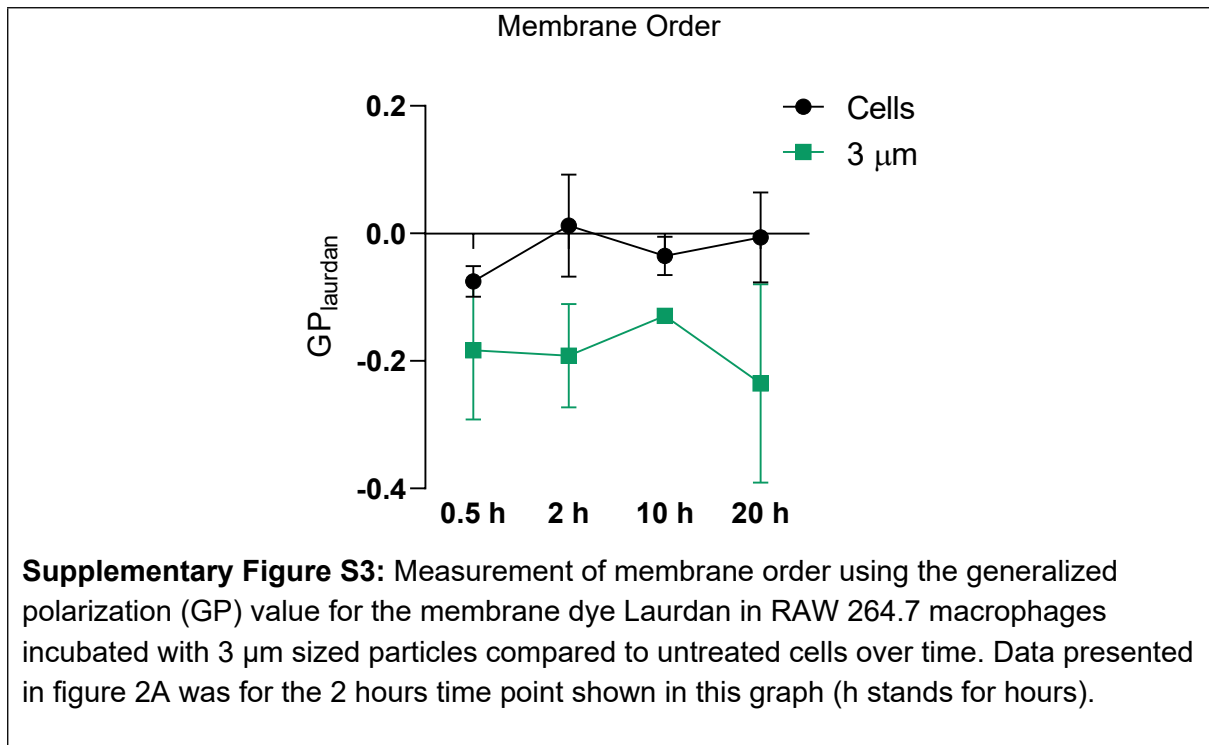

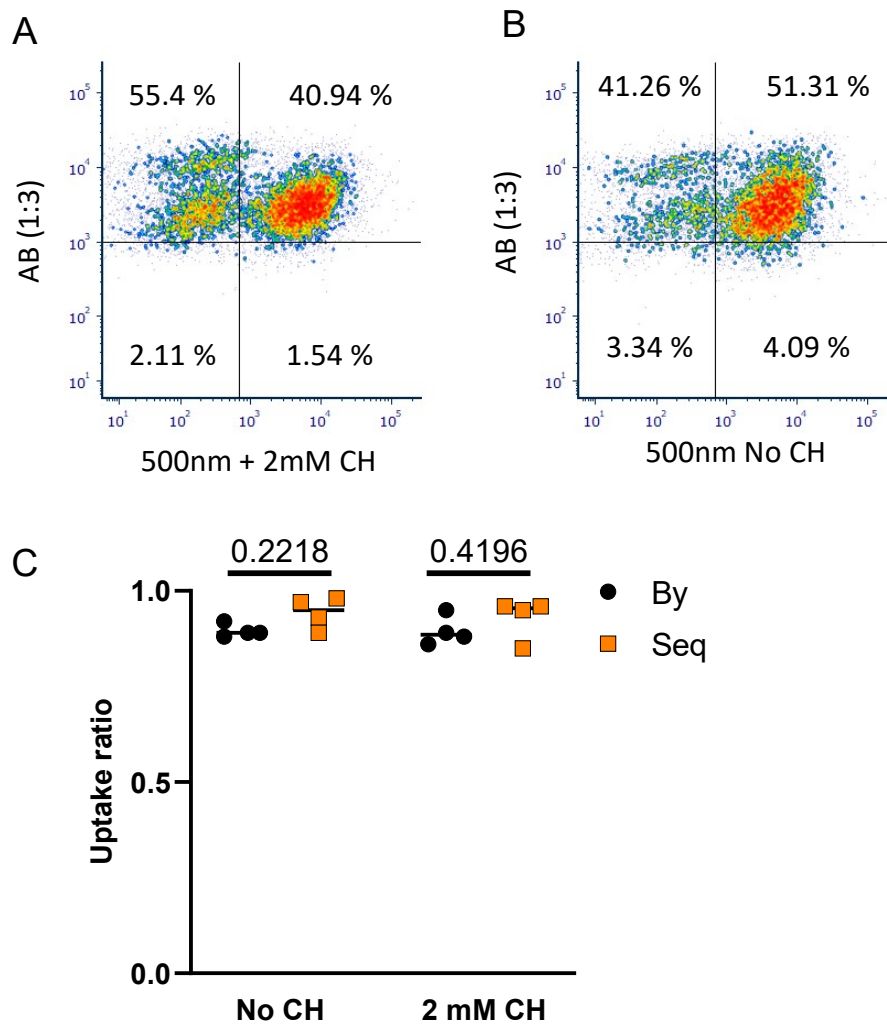

**Supplementary Figure S4: Cholesterol supplementation does not alter efferocytosis in macrophages treated with sub-micron particles**

**A and B** – Representative flow cytometry plots showing apoptotic body (AB) uptake in particle-treated macrophages with or without cholesterol supplementation.

**C** – Quantification of bystander (By) and sequential (Seq) uptake ratios among BMDMs that have been cultured with cholesterol (CH) or no CH (control) and subjected to 500nm PS treatment followed by the addition of apoptotic bodies. p values are mentioned, which were calculated using a two-way ANOVA followed by Sidak test; N = 4 independent experiments.

**A****MerTK Expression**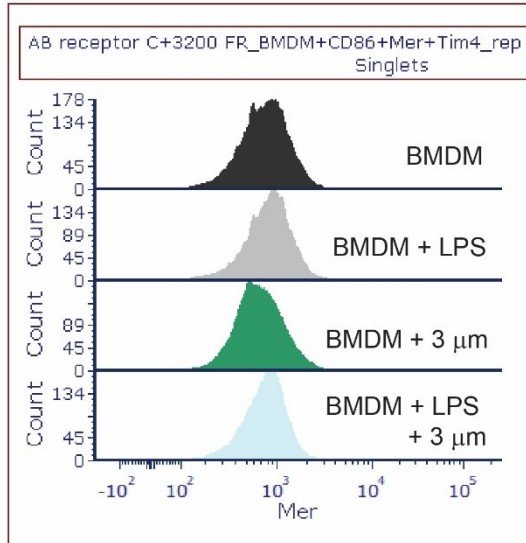**B****TIM4 Expression**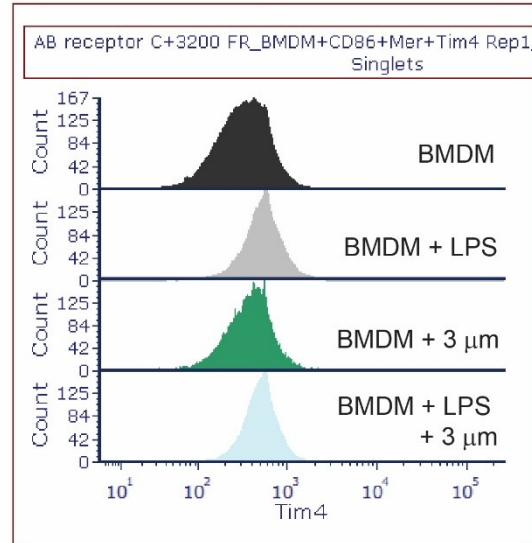

**Supplementary Figure S5:** Representative flow cytometry histograms supporting data presented in figure 4, showing the expression (fluorescence intensity in the x-axis) of MerTK (**A**) and Tim4 (**B**) in bone marrow derived macrophages (BMDMs) following various treatments.

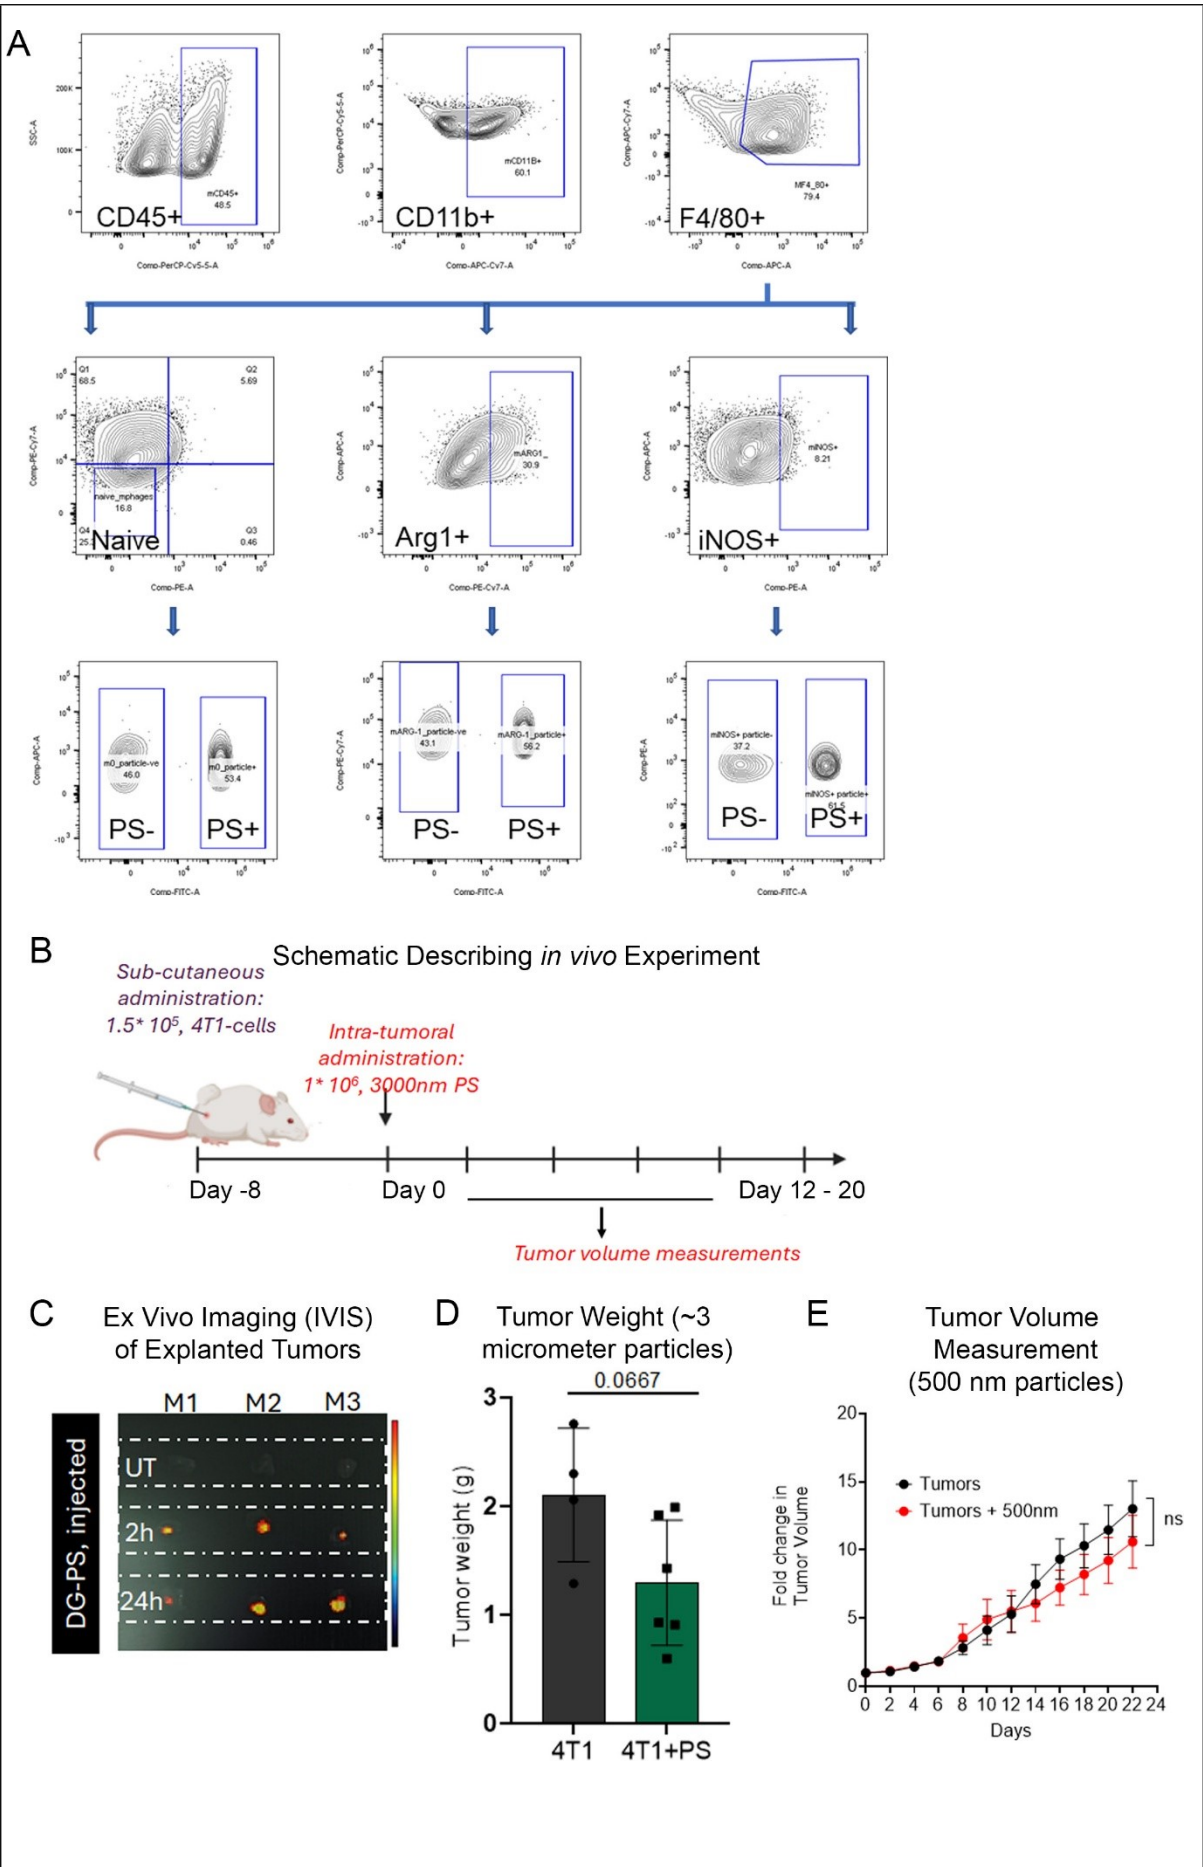

**Supplementary Figure S6: Ex vivo and in vivo studies in 4T1 tumors.**

**A** – Flow cytometry plots showing macrophage subsets in ex vivo incubation of dissociated tumor cells with and without fluorescent PS particles.

**B** – Schematic of in vivo experimental design where BALB/c mice bearing  $>50 \text{ mm}^3$  (in volume) 4T1 tumors received single intratumoral dose of  $1 \times 10^6$ ,  $3 \mu\text{m}$  sized fluorescent microparticles, while untreated tumor-bearing mice served as controls.

**C** – An independent experiment to determine if fluorescently-labelled  $\sim 3 \mu\text{m}$  sized PS microparticles injected in the tumor-bearing mice remain inside tumors. Imaging was performed using an in vivo imaging system (IVIS).

**D** - Measurement of the weight of excised tumors at the endpoint of the experiment from un-injected and  $\sim 3 \mu\text{m}$  sized PS microparticle injected tumors. p value was calculated by performing a Mann-Whitney test.

**E** – Fold change in tumor volume of untreated tumors versus 500 nm-sized particle-treated group.  $P=0.3009$ , two-way ANOVA followed by Sidak test
